# Supplementary material for: Hematopoietic Prostaglandin D Synthase Is Increased in Mast Cells and Pericytes in Autopsy Myocardial Specimens from Patients with Duchenne Muscular Dystrophy
Source: MDPI journal article supplement (doi:10.3390/ijms25031846), 2024-02-03
Supplement: s1 [file s1]

Supplementary Table S1. Primer sets for Quantitative RT-PCR analysis of gene expression.

| Gene  |         | Sequence                      |
|-------|---------|-------------------------------|
| HPGDS | Forward | 5'-TCTTCACCAGAGCCTAGCAAT-3'   |
|       | Reverse | 5'-AAGTCTGCCCAAGTTACAGAGTT-3' |
| COX1  | Forward | 5'-GGAGTTCTACCCTGGACTGC-3'    |
|       | Reverse | 5'-AGACCAGCTTCTTCAGTGTG-3'    |
| COX2  | Forward | 5'-CCCAGCACTTCACGCATCAG-3'    |
|       | Reverse | 5'-CGCTGTCTAGCCAGAGTTTC-3'    |
| GAPDH | Forward | 5'-GTCTCCTCTGACTTCAACAGCG-3'  |
|       | Reverse | 5'-ACCACCCTGTTGCTGTAGCCAA-3'  |

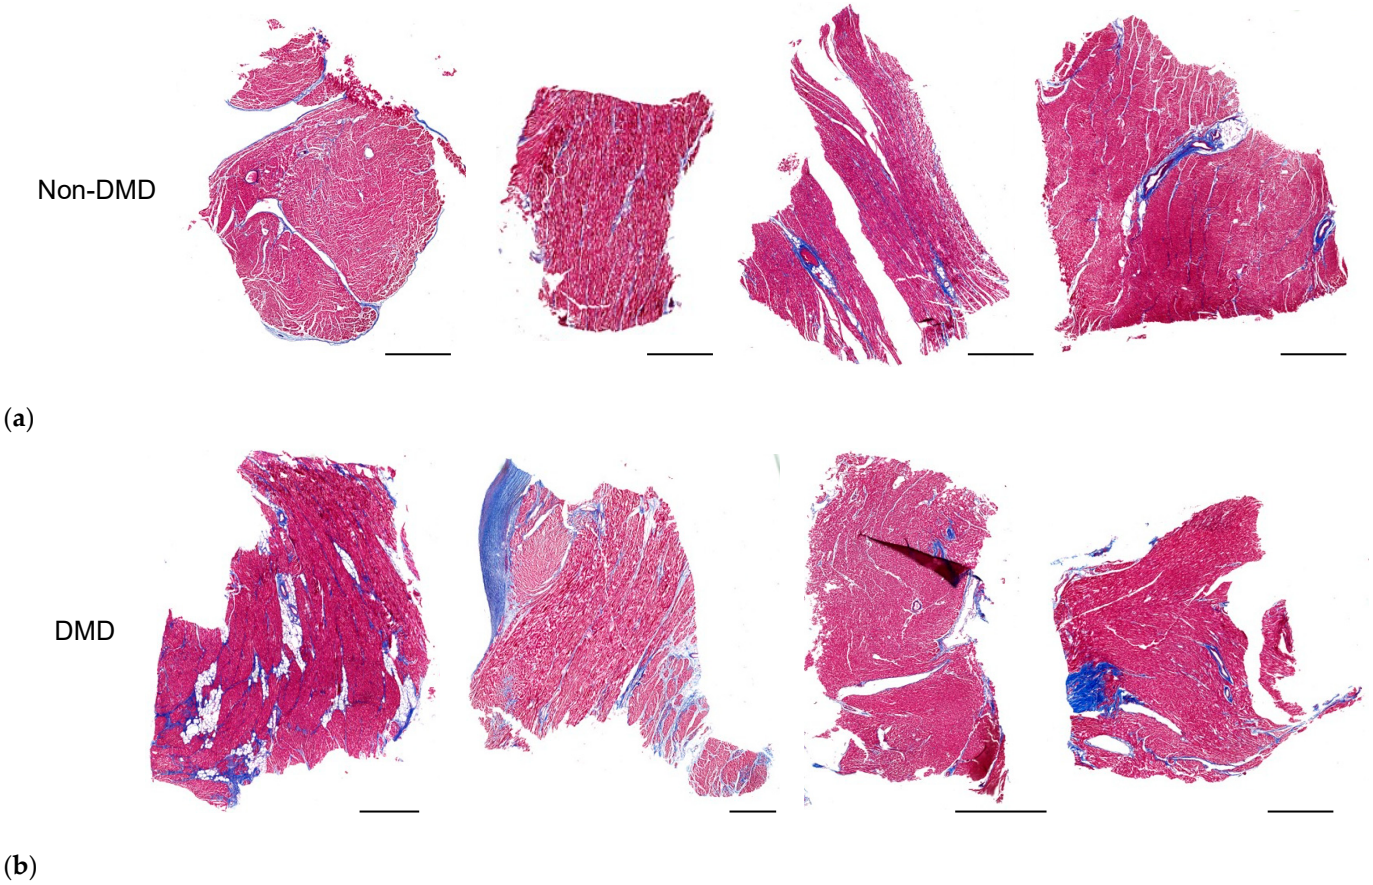

Supplementary Figure S1. Masson's trichrome stain images of autopsy myocardial specimens obtained from non-DMD (a) and DMD patients (b). The scale bar indicates 1,000 μm.

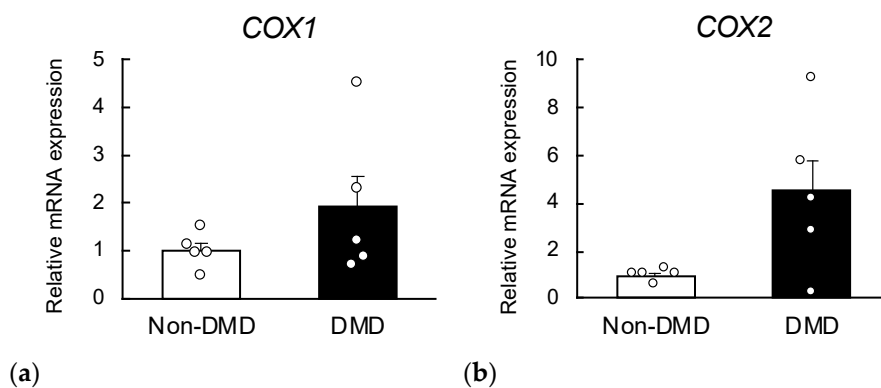

**Supplementary Figure S2.** Comparison of *COX1* (a) and *COX2* (b) mRNA expression levels in the autopsy myocardial specimens obtained from non-DMD and DMD patients. In all panels, each value represents the mean ± S.E. (n = 5). There were no significant differences between the two groups (unpaired Student's t test).

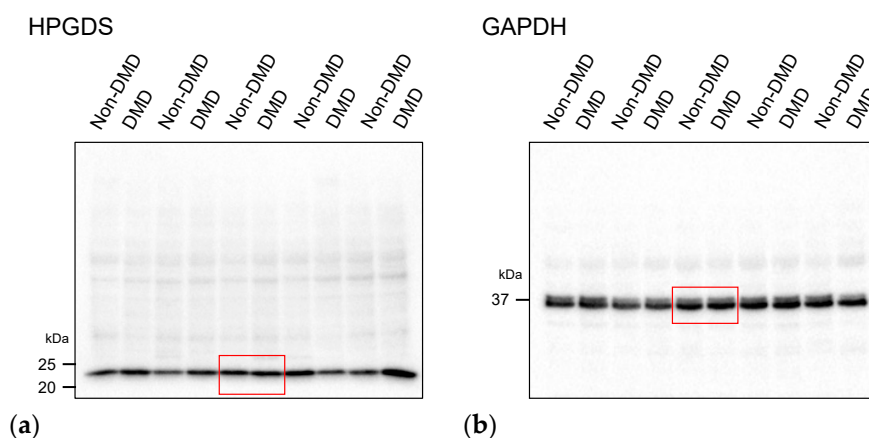

**Supplementary Figure S3.** Western blotting images of HPGDS (a) and GAPDH (b) proteins extracted from the autopsy myocardial specimens of non-DMD and DMD patients. The parts boxed in red were trimmed and used in Figure 2B.

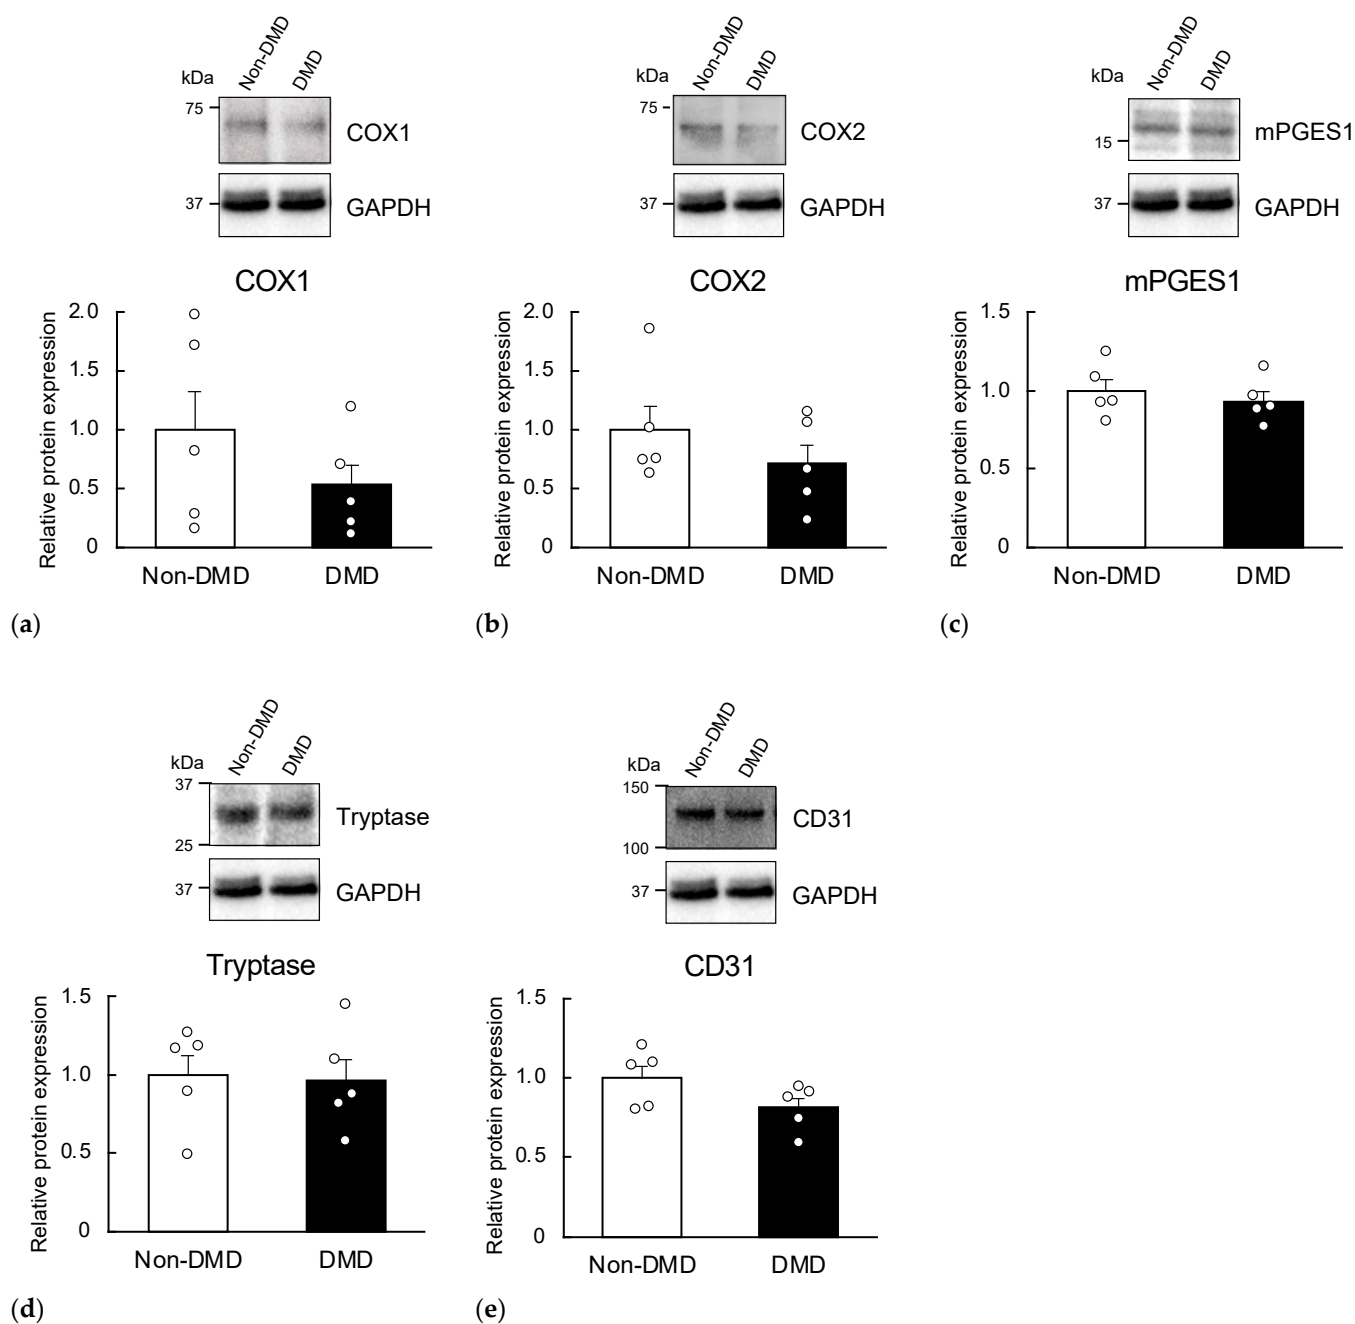

**Supplementary Figure S4.** Comparison of COX1 (a), COX2 (b), mPGES1 (c), Tryptase (d), and CD31 (e) protein expression levels in the autopsy myocardial specimens obtained from non-DMD and DMD patients. In all panels, each value is the mean  $\pm$  S.E. ( $n = 5$ ). There were no significant differences between the two groups (unpaired Student's  $t$  test).

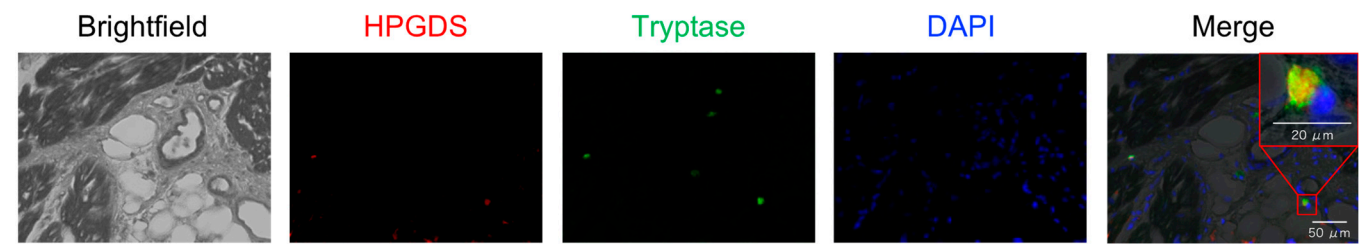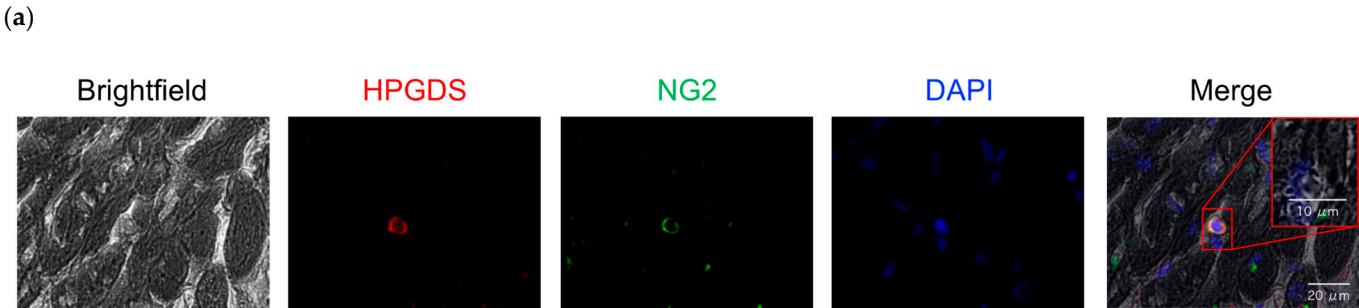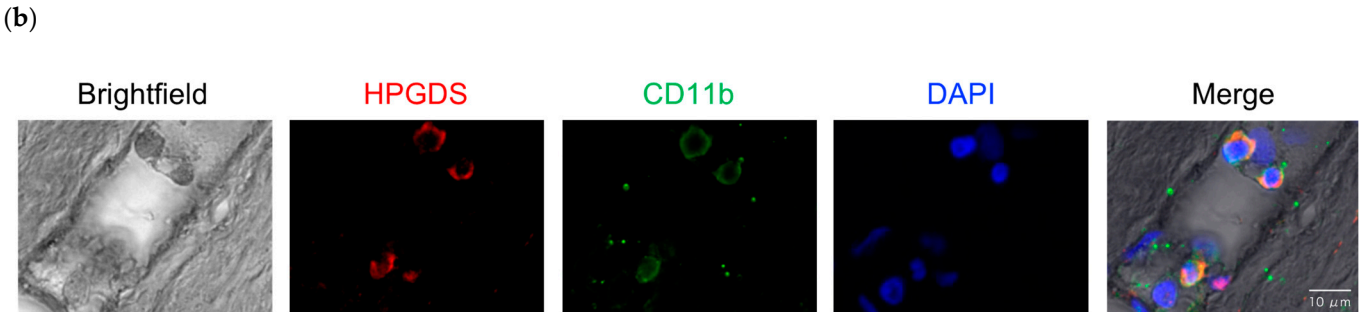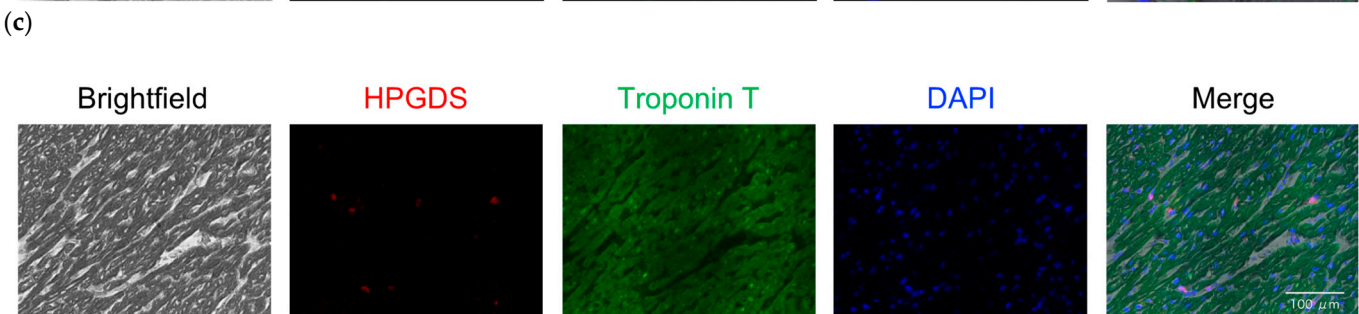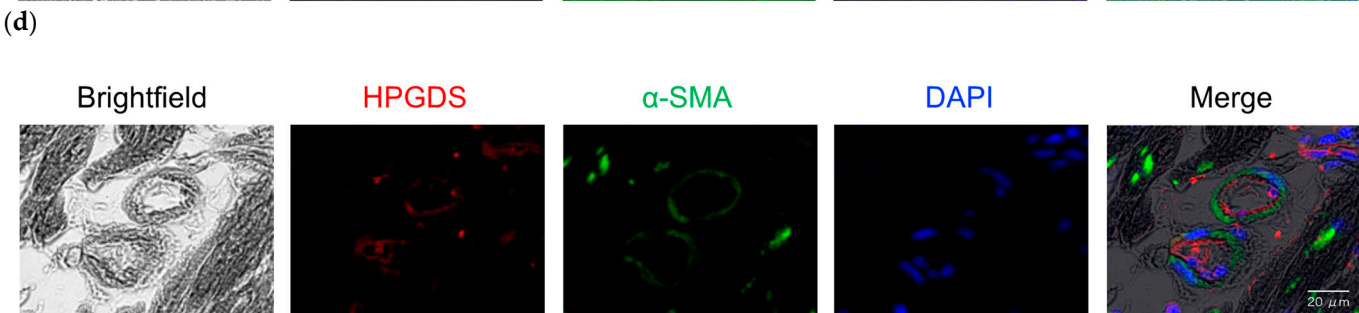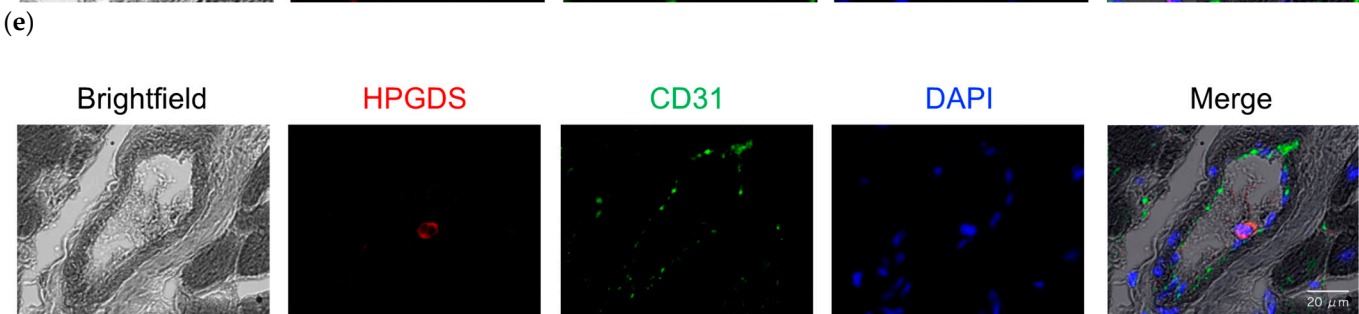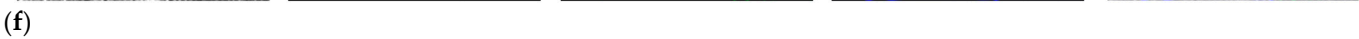



**Supplementary Figure S5.** Representative images without superimposition of fluorescent immunostaining to identify HPGDS-expressing cells in the autopsy myocardial specimens obtained from DMD patients. All images have the same settings for HPGDS (red), DAPI (blue), and Bright-field, for green: Tryptase (a), NG2 (b), CD11b (c), Troponin T (d),  $\alpha$ -SMA (e), and CD31 (f). Each merged image was used in Figure 2B. The scale bars are indicated on each image.

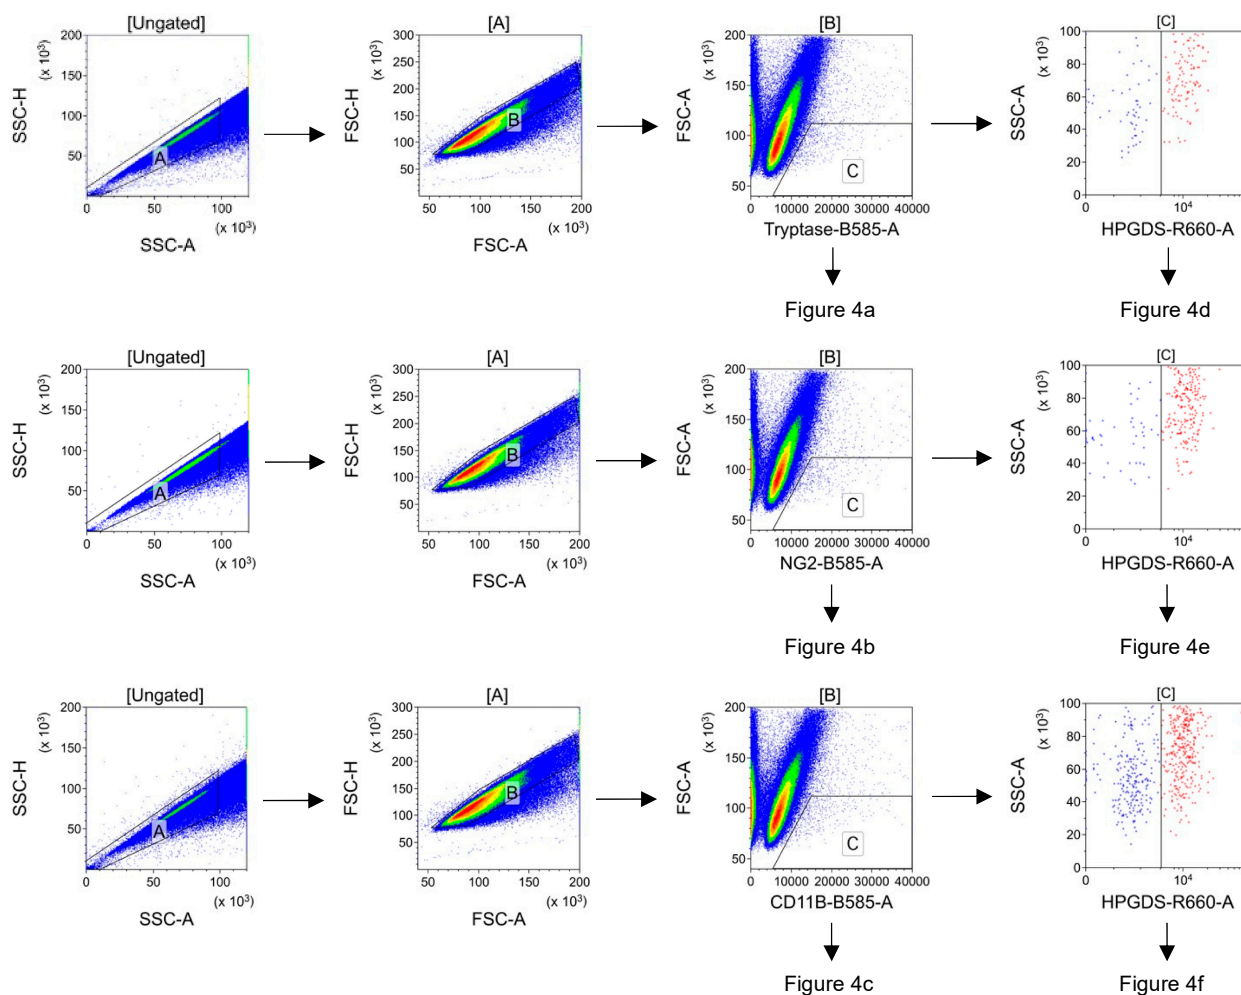

**Supplementary Figure S6.** Gating strategies used for flow cytometry analysis in Figure 4.
